# Supplementary material
Source: PubMed Central journal article supplement (PMC5739962)
Supplement: NIHMS919476-supplement-1.pdf [file NIHMS919476-supplement-1.pdf]

## Supplemental Information

Supplemental information contains 1 figure, 4 tables, and 2 movies.

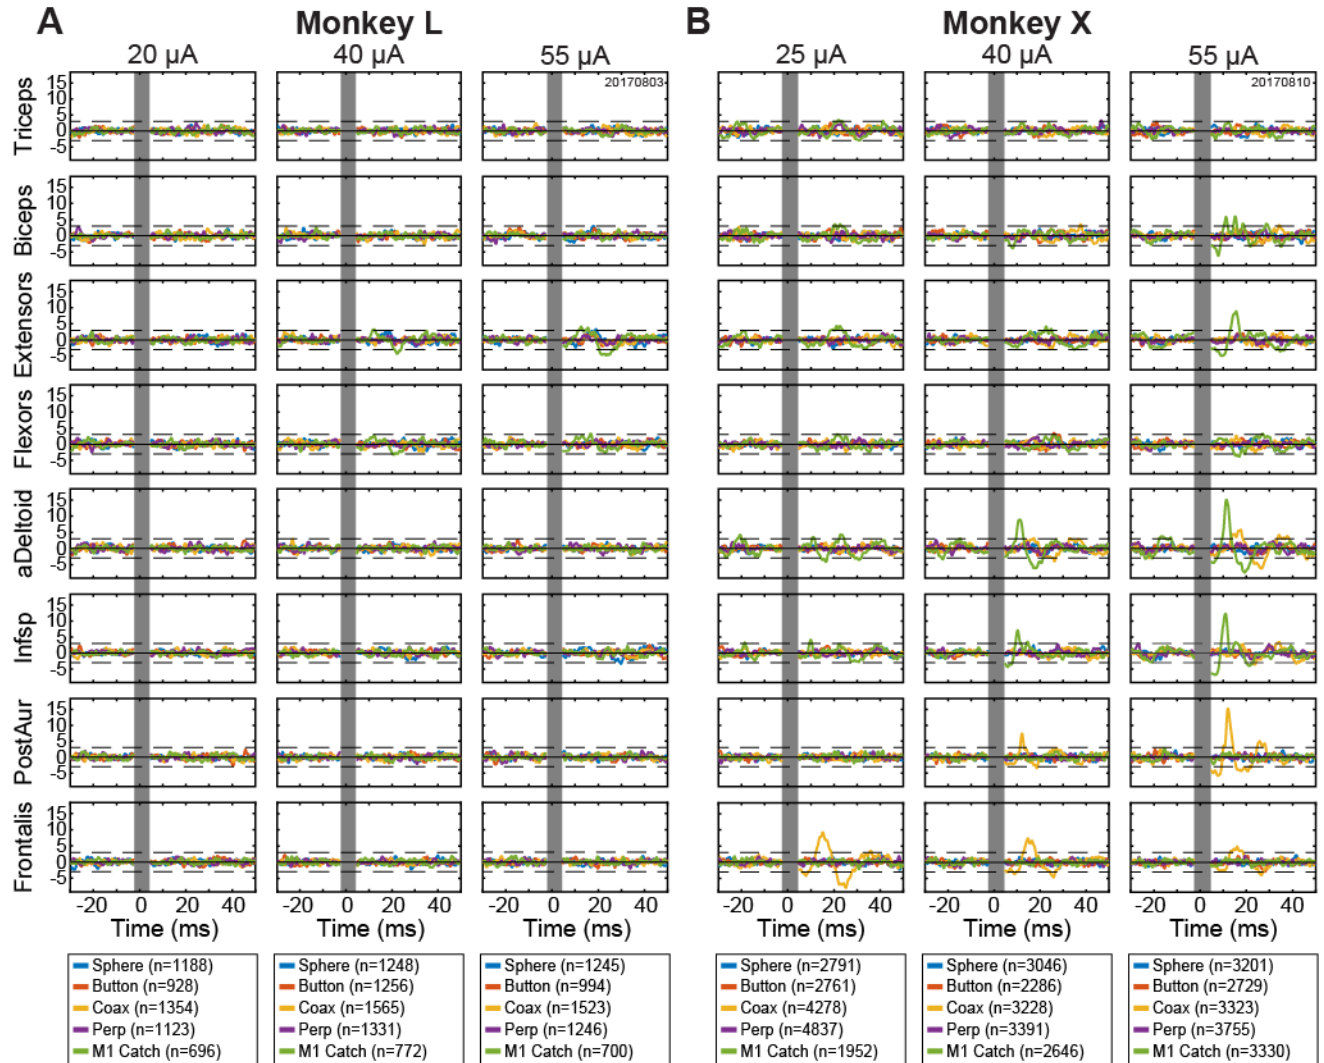

**Figure S1. Related to Figure 4.** Stimulus-triggered averages of EMG activity: Expanded search. Averages of rectified EMG activity from eight muscle groups of the upper extremity and head—Triceps, Biceps, forearm Extensors, and forearm Flexors, Infraspinatus (Infsp), anterior deltoid (aDeltoid), posterior auricular (PostAur), and Frontalis—were compiled for each monkey (**A**, monkey L; **B**, monkey X) using individual ICMS pulses at three different current amplitudes as triggers. Other ICMS parameters used for these sessions are given in Table S4. Separate averages (colors) were compiled for  $n$  pulses delivered through the PM electrode during LED-instructed trials involving the sphere, button, coaxial cylinder, or perpendicular cylinder, as well as for catch-trial pulses delivered in M1. The vertical gray bar indicates the interval during which the aligned stimulation artifacts have been blanked. Each trace has been z-scored. The dashed horizontal black lines represent  $\pm 3$  standard deviations from the bootstrap-adjusted baseline, i.e. the solid black horizontal line.

**Table S1. Related to Figure 2.** Stimulation Parameters for PM- and S1-ICMS during training.

|                      | <b>PM-ICMS</b>       | <b>S1-ICMS</b>       |
|----------------------|----------------------|----------------------|
| Monkey L             |                      |                      |
| Number of Electrodes | 3                    | 4 – 6                |
| Period Frequencies   | 80, 100, 120, 150 Hz | 50, 75, 125, 225 Hz  |
| Amplitudes           | 18 – 28 $\mu$ A      | 20 – 60 $\mu$ A      |
| Monkey X             |                      |                      |
| Number of Electrodes | 3 – 4                | 3 – 5                |
| Periodic Frequencies | 50, 75, 125, 200 Hz  | 75, 100, 150, 225 Hz |
| Amplitudes           | 20 – 25 $\mu$ A      | 25 – 55 $\mu$ A      |

**Table S2. Related to Figure 2.** Performance with different instruction modalities.

|          | <b>Success Rate (%)</b><br>[N <sub>Success</sub> /N <sub>Total</sub> ] | <b>Reaction Time (ms)</b><br><b>Median [25%,75%]</b> | <b>Movement Time (ms)</b><br><b>Median [25%,75%]</b> |
|----------|------------------------------------------------------------------------|------------------------------------------------------|------------------------------------------------------|
| Monkey L |                                                                        |                                                      |                                                      |
| PM-ICMS  | 99.1 [1734 / 1750]                                                     | 288 [260, 321]                                       | 189 [165, 213]                                       |
| S1-ICMS  | 95.6 [1836 / 1920]                                                     | 307 [269, 319]                                       | 231 [207, 265]                                       |
| LED      | 99.1 [3348 / 3378]                                                     | 298 [279, 363]                                       | 215 [191, 235]                                       |
| Monkey X |                                                                        |                                                      |                                                      |
| PM-ICMS  | 88.7 [1438 / 1622]                                                     | 438 [376, 545]                                       | 155 [139, 209]                                       |
| S1-ICMS  | 83.1 [965 / 1161]                                                      | 559 [451, 918]                                       | 143 [129, 173]                                       |
| LED      | 88.8 [2420 / 2725]                                                     | 647 [450, 1061]                                      | 159 [141, 195]                                       |

**Table S3. Related to Figure 3. PM-ICMS parameter used during sweeping experiments.**

|                            | <b>Constant Parameter</b>   | <b>Swept Parameter</b> |
|----------------------------|-----------------------------|------------------------|
| Monkey L                   |                             |                        |
| Periodic Frequency         |                             | 20 – 100 Hz            |
| Inter-pulse Interval Range | 12.5 – 40 ms                |                        |
| Amplitude                  | 10 – 28 $\mu$ A             | 2 – 20 $\mu$ A         |
| Train Duration             | Until target object contact | 50 to 1000 ms          |
| Monkey X                   |                             |                        |
| Periodic Frequency         |                             | 20 – 100 Hz            |
| Inter-pulse Interval Range | 12.5 – 30 ms                |                        |
| Amplitude                  | 20 – 25 $\mu$ A             | 5 – 25 $\mu$ A         |
| Train Duration             | Until target object contact | 50 to 1000 ms          |

**Table S4. Related to Figure 4. ICMS parameters used for stimulus-triggered averaging.**

|                       | <b>PM-ICMS</b> | <b>M1-ICMS</b> |
|-----------------------|----------------|----------------|
| Monkey L              |                |                |
| Number of Sessions    |                | 2              |
| Number of Electrodes  | 1              | 1              |
| Amplitudes            | 20 $\mu$ A     | 20 $\mu$ A     |
| Inter-pulse intervals | 12.5 to 40 ms  | 12.5 to 40 ms  |
| Success Rate          | 98.2%          | 22.1%          |
| Monkey X              |                |                |
| Number of Sessions    |                | 4              |
| Number of Electrodes  | 1              | 1              |
| Amplitudes            | 25 $\mu$ A     | 25 $\mu$ A     |
| Inter-pulse intervals | 12.5 to 30 ms  | 12.5 to 30 ms  |
| Success Rate          | 91.6%          | 10.6%          |

## **Movie Legends**

**Movie S1. Related to Figure 2.** Interleaved PM-ICMS and LED Instructions. Monkey L performed pseudorandomly interleaved trials instructed by either PM-ICMS or LEDs. During PM-ICMS instructions, PM-ICMS was delivered but blue LEDs at the base of the target object were turned OFF. During LED instructions, no PM-ICMS was delivered but blue LEDs at the base of the target object were turned ON. With either type of instruction, blue LEDs at the base of the home object turn ON to indicate that the monkey can begin a new trial and turn OFF at the end of the initial hold period simultaneous with the onset of the instruction. The high-pitched tone indicates that the trial was a success and a reward is being delivered; the low-pitched tone indicates that an error was made.

**Movie S2. Related to Figure 2.** Interleaved PM-ICMS and LED Instructions with Annotated Trials. Same video as Movie S1 with annotations of the instruction for each trial.
